# Supplementary material for: Cells must express components of the planar cell polarity system and extracellular matrix to support cytonemes
Source: eLife. 2016 Sep 3;5:e18979. doi: 10.7554/eLife.18979 (PMC5030081; doi:10.7554/eLife.18979)
Supplement: Figure 1—figure supplement 1—source data 1. — DOI: http://dx.doi.org/10.7554/eLife.18979.006 [file elife-18979-fig1-figsupp1-data1.xlsx]

## Sheet: Sheet1
Figure 1-suppl 1	ds	41	118	0.347458
		24	90	0.266667
		69	139	0.496403
		52	175	0.297143
		37	155	0.23871
	Mean			0.329276
	STDEV			0.101755
	ft	24	164	0.146341
		69	144	0.479167
		45	111	0.405405
		28	90	0.311111
		55	172	0.319767
	Mean			0.332358
	STDEV			0.1246
