# Supplementary material for: Cells must express components of the planar cell polarity system and extracellular matrix to support cytonemes
Source: eLife. 2016 Sep 3;5:e18979. doi: 10.7554/eLife.18979 (PMC5030081; doi:10.7554/eLife.18979)
Supplement: Figure 1—source data 1. — DOI: http://dx.doi.org/10.7554/eLife.18979.004 [file elife-18979-fig1-data1.xlsx]

## Sheet: Sheet1
Figure 1		# cytonemes	perimeter	#/perimeter
	control	99	150	0.66
		86	158	0.544304
		117	162	0.722222
		80	117	0.683761
		98	144	0.680556
	Mean			0.658168
	STDEV			0.0675047
	pk	48	125	0.384
		30	101	0.29703
		27	116	0.232759
		26	122	0.213115
		35	123	0.284553
	Mean			0.282291
	STDEV			0.0667193
	Vang	65	176	0.369318
		44	117	0.376068
		60	162	0.37037
		36	138	0.26087
		43	115	0.373913
	Mean			0.350108
	STDEV			0.0499593
