# Supplementary material for: Cells must express components of the planar cell polarity system and extracellular matrix to support cytonemes
Source: eLife. 2016 Sep 3;5:e18979. doi: 10.7554/eLife.18979 (PMC5030081; doi:10.7554/eLife.18979)
Supplement: Figure 2—figure supplement 1—source data 1. — DOI: http://dx.doi.org/10.7554/eLife.18979.011 [file elife-18979-fig2-figsupp1-data1.xlsx]

## Sheet: Sheet1
Figure 2-suppl 1	ap>pk	# cytonemes	perimeter	#/perimeter
		45	121	0.371901
		35	145	0.241379
		21	113	0.185841
		49	110	0.445455
		37	121	0.305785
	Mean			0.310072
	STDEV			0.102861
	btl>pk
		95	150	0.633333
		75	152	0.493421
		85	146	0.582192
		110	127	0.866142
		75	141	0.531915
	Mean			0.621401
	STDEV			0.146598
	ap>Vang	# cytonemes	perimeter	#/perimeter
		27	111	0.243243
		34	128	0.265625
		44	126	0.349206
		53	132	0.401515
		66	154	0.428571
	Mean			0.337632
	STDEV			0.0815157
	btl>Vang	# cytonemes	perimeter	#/perimeter
		110	143	0.769231
		92	153	0.601307
		99	149	0.66443
		75	141	0.531915
		69	130	0.530769
	Mean			0.61953
	STDEV			0.100391
	ap>fz	# cytonemes	perimeter	#/perimeter
		64	136	0.470588
		92	157	0.585987
		75	134	0.559701
		98	159	0.616352
		76	129	0.589147
	Mean			0.564355
	STDEV			0.0561253
	btl>fz	# cytonemes	perimeter	#/perimeter
		70	172	0.406977
		92	154	0.597403
		58	123	0.471545
		68	121	0.561983
		60	132	0.454545
	Mean			0.498491
	STDEV			0.0788146
	ap>fmi	# cytonemes	perimeter	#/perimeter
		69	118	0.584746
		68	121	0.561983
		88	122	0.721311
		91	135	0.674074
		62	142	0.43662
	Mean			0.595747
	STDEV			0.110095
	btl>fmi	# cytonemes	perimeter	#/perimeter
		63	120	0.525
		67	159	0.421384
		91	150	0.606667
		73	173	0.421965
		77	131	0.587786
	Mean			0.51256
	STDEV			0.0883039
