# Supplementary material for: Cells must express components of the planar cell polarity system and extracellular matrix to support cytonemes
Source: eLife. 2016 Sep 3;5:e18979. doi: 10.7554/eLife.18979 (PMC5030081; doi:10.7554/eLife.18979)
Supplement: Figure 5—figure supplement 1—source data 1. — DOI: http://dx.doi.org/10.7554/eLife.18979.017 [file elife-18979-fig5-figsupp1-data1.xlsx]

## Sheet: Sheet1
Figure 5-suppl 1	cycles	WT-dally	pk-dally	Vang-dally
		17.56	17.51	17.24
		17.46	17.57	17.32
		17.68	17.37	17.26
	cycles	WT-dlp	pk-dlp	Vang-dlp
		22.39	22.33	22.17
		22.34	22.28	22.16
		22.35	22.52	22.11
	cycles	WT-actin	pk-actin	Vang-actin
		18.77	18.75	18.52
		18.81	18.73	18.54
		18.79	18.67	18.52
