# Supplementary material for: Cells must express components of the planar cell polarity system and extracellular matrix to support cytonemes
Source: eLife. 2016 Sep 3;5:e18979. doi: 10.7554/eLife.18979 (PMC5030081; doi:10.7554/eLife.18979)
Supplement: Figure 5—source data 1. — DOI: http://dx.doi.org/10.7554/eLife.18979.015 [file elife-18979-fig5-data1.xlsx]

## Sheet: Sheet1
Figure 5
	clone anti-Dlp		pk13/+	pk13/pk13
		intensity value	28.39	12.469
			28.075	15.719
			31.75	10.788
			35.406	14.778
		Mean	30.9053	13.4385
		STDEV	3.4306	2.23309
			Vang6/+	Vang6/Vang6
			35.153	13.085
			31.979	13.178
			20.31	9.289
			26.203	9.123
		Mean	28.4113	11.1687
		STDEV	6.54947	2.26772
	dallyYFP	pkRNAi	anterior	posterior
			10.882	5.273
			14.312	8.545
			15.151	7.626
			14.976	8.539
		Mean	13.8302	7.49575
		STDEV	1.99845	1.54347
		VangRNAi	anterior	posterior
			12.92	5.21
			10.989	7.581
			15.158	7.637
			11.096	7.189
		Mean	12.5407	6.90425
		STDEV	1.95696	1.14695
	clone anti-Laminin		pk13/+	pk13/pk13
			70.241	39.132
			78.242	29.722
			70.524	41.229
			68.992	45.729
		Mean	71.9998	38.953
		STDEV	4.21439	6.74136
