# Supplementary material for: Cells must express components of the planar cell polarity system and extracellular matrix to support cytonemes
Source: eLife. 2016 Sep 3;5:e18979. doi: 10.7554/eLife.18979 (PMC5030081; doi:10.7554/eLife.18979)
Supplement: Figure 6—source data 1. — (A–C) Numbers of ASP cytonemes in dally and dlp mutants. (D–I) Quantification of Dad-GFP signal and dpERK staining in the ASPs of control, dallyRNAi and dlpRNAi flies. (J) Orientations of ASP cytonemes in control, dally and dlp mutants. DOI: http://dx.doi.org/10.7554/eLife.18979.020 [file elife-18979-fig6-data1.xlsx]

## Sheet: Sheet1
Figure 6 A-C		# cytonemes	perimeter	#/perimeter
	dally	36	166	0.216867
		42	159	0.264151
		24	68	0.352941
		40	130	0.307692
		21	85	0.247059
	Mean			0.277742
	STDEV			0.0533475
	dlp	69	165	0.418182
		63	142	0.443662
		46	98	0.469388
		63	149	0.422819
		68	123	0.552846
	Mean			0.461379
	STDEV			0.0549933
Figure 6D-I
	dad-GFP	control	dally80	dlpA187
		30.004	15.953	29.19
		23.813	11.31	30.96
		26.992	12.427	27.091
		29.617	7.637	25.789
	Mean	27.6065	11.8317	28.2575
	STDEV	2.86114	3.42574	2.28234
	dpERK	control	dally80	dlpA187
		36.227	40.468	29.844
		47.468	53.583	22.405
		49.382	51.922	27.175
		49.613	45.429	14.922
	Mean	45.6725	47.8505	23.5865
	STDEV	6.36996	6.04989	6.5448
Figure 6 J	control	Angle	Length
		-88.493	0.396
		-106.991	0.392
		-98.366	0.358
		-70.253	0.432
		-69.677	0.3
		-71.03	0.352
		-66.194	0.387
		-63.435	0.28
		-71.565	0.428
		-64.134	0.382
		-72.646	0.349
		-30.964	0.364
		-42.614	0.354
		-23.962	0.308
		-1.061	0.563
		11.56	0.468
		5.528	0.649
		0	0.76
		2.701	1.105
		12.339	1.024
		8.531	0.632
		11.944	0.554
		0	0.604
		11.47	0.733
		7.943	0.905
		10.46	0.689
		13.431	0.718
		19.29	0.662
		13.349	0.632
		7.792	0.999
		6.271	0.954
		11.547	0.989
		17.723	1.061
		20.638	0.857
		33.69	0.488
		72.646	0.349
		-67.834	0.304
		-90	0.198
		-90	0.135
		-85.03	0.24
		-63.435	0.233
		-83.418	0.273
		-90	0.177
		-98.13	0.221
		-90	0.219
		-136.975	0.214
		92.49	0.24
		-75.466	0.291
		-101.31	0.159
		-98.973	0.2
		-104.036	32.985
		-90	24
		-106.699	51.467
		-104.036	49.477
		-49.844	41.655
		-112.521	44.821
		-158.199	64.622
		-58.815	44.821
		-68.199	49.026
		-78.44	44.979
		-72.474	59.896
		-70.821	73.37
		-68.749	57.442
		-72.582	53.133
		-27.759	107.373
		-74.055	29.12
		-22.416	86.667
		-79.216	42.1
		-75.964	41.074
		-33.179	124.258
		-26.565	89.443
		-22.036	44.821
		-24.02	100.859
		-11.211	112.704
		0	58.667
		-14.036	86.667
		-22.543	114.154
		-5.11	123.13
		0	122.667
		0	88
		21.125	47.291
		0	56
		0	61.333
		16.699	83.522
		47.121	38.667
		31.608	31.098
		45	26.399
		56.31	40.31
		90	49.333
		90	52
		116.565	39.956
		75.53	31.693
		94.574	49.495
		111.105	61.651
		94.667	49.495
		102.095	57.271
		158.749	38.39
		90	36
		122.735	32.931
		100.62	32.441
		98.881	32.441
	dally	Angle	Length
		23.025	0.453
		18.886	0.418
		29.932	0.397
		9.162	0.327
		11.592	0.415
		13.496	0.268
		2.603	0.229
		30.256	0.145
		-4.574	0.522
		-16.39	0.185
		-25.346	0.219
		-33.69	0.376
		-41.634	0.125
		25.907	0.405
		77.005	0.139
		77.471	0.096
		-2.045	0.292
		-11.768	0.255
		11.31	0.266
		-9.782	0.307
		0	0.333
		-14.47	0.333
		27.897	0.2
		42.879	0.199
		32.905	0.211
		28.301	0.154
		28.706	0.499
		34.824	0.584
		39.523	0.54
		38.501	0.586
		30.735	0.448
		12.995	0.278
		-117.759	0.224
		-129.289	0.148
		-139.764	0.177
		-21.801	0.224
		-34.216	0.315
		-61.928	0.177
		-6.34	0.472
		-6.34	0.472
		84.56	0.22
		16.144	0.412
		37.405	0.223
		17.241	0.633
		17.65	0.481
		29.982	0.313
		28.887	0.345
		26.565	0.419
		18.083	0.537
		12.804	0.235
		27.553	0.27
		10.204	0.529
		7.815	0.536
		-2.045	0.292
		-8.471	0.495
		-5.492	0.544
		-35.838	0.231
		-3.434	0.522
		-38.66	0.467
		11.889	0.405
		-8.616	0.348
		22.62	0.271
		38.66	0.2
		7.696	0.389
		39.611	0.392
		16.821	0.468
		18.034	0.471
		29.197	0.406
		14.676	0.452
		-1.397	0.427
		0	0.219
		0	0.198
		-33.69	0.263
		-67.834	0.304
		21.161	0.346
		6.116	0.293
		0	0.323
		23.962	0.205
		0	0.281
		30.256	0.289
		15.124	0.399
		-4.086	0.146
		-10.081	0.476
		-60.642	0.191
		21.038	0.435
		2.793	0.428
		7.125	0.336
		2.793	0.428
		35.838	0.231
		9.462	0.38
		1.685	0.354
		-90	0.167
		-32.196	0.332
		-30.579	0.266
		-11.768	0.511
		41.424	0.472
		15.573	0.66
		16.991	0.392
		-39.094	0.215
		-113.749	0.285
	dlp	Angle	Length
		83.66	0.283
		126.87	0.208
		110.854	0.234
		74.745	0.356
		114.228	0.228
		111.251	0.201
		86.186	0.313
		-61.189	0.238
		20.136	0.333
		51.34	0.133
		-51.34	0.133
		-42.274	0.155
		-88.091	0.313
		-90	0.396
		-102.339	0.341
		-65.433	0.401
		-87.614	0.25
		-115.346	0.219
		-90	0.271
		-97.765	0.231
		-125.91	0.373
		-74.745	0.238
		-109.093	0.287
		-90	0.219
		-79.992	0.18
		-73.74	0.26
		-90	0.219
		-84.094	0.304
		-87.709	0.261
		-77.471	0.384
		-90	0.219
		-86.634	0.177
		102.529	0.192
		71.565	0.198
		90	0.385
		90	0.271
		81.027	0.2
		87.797	0.271
		90	0.292
		82.569	0.242
		104.931	0.323
		-69.775	0.211
		-54.782	0.217
		-90	0.281
		-97.125	0.336
		-90	0.354
		-118.887	0.345
		-94.97	0.24
		2.045	0.292
		15.945	0.303
		90	0.156
		14.036	0.258
		-9.162	0.327
		-15.945	0.303
		-94.086	0.146
		-93.814	0.313
		-106.699	0.218
		141.953	0.304
		52.595	0.223
		110.556	0.178
		55.62	0.24
		84.806	0.23
		60.945	0.214
		53.471	0.35
		23.199	0.476
		61.26	0.368
		45.939	0.449
		-53.13	0.312
		-62.447	0.27
		-90	0.167
		-90	0.146
		-82.875	0.168
		-90	0.219
		-90	0.167
		-92.203	0.271
		-109.026	0.32
		-68.199	0.28
		-61.557	0.284
		-90	0.354
		-87.614	0.25
		-90	0.312
		-95.711	0.314
		-104.534	0.291
		-95.906	0.304
		-97.907	0.379
		-104.036	0.215
		-104.036	0.258
		-110.136	0.333
		-101.976	0.351
		-104.744	0.205
		-90	0.375
		-90	0.333
		-90	0.396
		-86.424	0.167
		-51.633	0.319
		-84.806	0.23
		-59.421	0.266
		-87.397	0.229
		-106.928	0.25
		-111.801	0.168
		-106.699	0.218
		-90	0.219
		-69.146	0.234
