# Supplementary material for: Cells must express components of the planar cell polarity system and extracellular matrix to support cytonemes
Source: eLife. 2016 Sep 3;5:e18979. doi: 10.7554/eLife.18979 (PMC5030081; doi:10.7554/eLife.18979)
Supplement: Figure 8—figure supplement 1—source data 1. — Numerical data are represented as a graph in Figure 8M. DOI: http://dx.doi.org/10.7554/eLife.18979.025 [file elife-18979-fig8-figsupp1-data1.xlsx]

## Sheet: Sheet1
Figure 8-suppl 1	scb	104	150	0.693333
		73	164	0.445122
		60	97	0.618557
		81	121	0.669421
		82	119	0.689076
	Mean			0.623102
	STDEV			0.103836
	aPS4	76	142	0.535211
		73	126	0.579365
		75	132	0.568182
		86	127	0.677165
		71	114	0.622807
	Mean			0.596546
	STDEV			0.054888
	b[V]	75	129	0.581395
		58	131	0.442748
		79	123	0.642276
		83	125	0.664
		94	131	0.717557
	Mean			0.609595
	STDEV			0.105258
	PS5
		134	174	0.770115
		89	143	0.622378
		60	162	0.37037
		90	133	0.676692
		92	128	0.71875
	Mean			0.631661
	STDEV			0.155837
