# Supplementary material for: Cells must express components of the planar cell polarity system and extracellular matrix to support cytonemes
Source: eLife. 2016 Sep 3;5:e18979. doi: 10.7554/eLife.18979 (PMC5030081; doi:10.7554/eLife.18979)
Supplement: Figure 8—source data 1. — (A–D) Numbers of ASP cytonemes in control and mysRNAi, mewRNAi and ifRNAi flies. Numerical data are represented as a graph in Figure 8M. (E–L) Quantification of dpERK staining and Dad-GFP fluorescence in the ASPs of control and mysRNAi, mewRNAi and ifRNAi flies. DOI: http://dx.doi.org/10.7554/eLife.18979.023 [file elife-18979-fig8-data1.xlsx]

## Sheet: Sheet1
Figure 8 A-D		# cytonemes	perimeter	#/perimeter
	control	89	141	0.631206
		68	128	0.53125
		83	141	0.588652
		91	140	0.65
		57	127	0.448819
	Mean			0.569985
	STDEV			0.0816708
	mys	49	136	0.360294
		56	131	0.427481
		52	118	0.440678
		39	139	0.280576
		47	133	0.353383
	Mean			0.372482
	STDEV			0.0644897
	mew	31	102	0.303922
		36	104	0.346154
		52	127	0.409449
		69	167	0.413174
		41	124	0.330645
	Mean			0.360669
	STDEV			0.0486534
	if	41	101	0.405941
		35	129	0.271318
		51	120	0.425
		58	119	0.487395
		27	96	0.28125
	Mean			0.374181
	STDEV			0.0943738
Figure 8E-L
	dpERK	control	mysRNAi	mewRNAi	ifRNAi
		47.323	27.741	25.146	19.589
		47.494	24.493	25.556	20.544
		66.523	17.132	21.077	26.117
		60.226	19.214	24.013	22.694
	Mean	55.3915	22.145	23.948	22.236
	STDEV	9.56999	4.84937	2.02219	2.8949
	dad-GFP	control	mysRNAi	mewRNAi	ifRNAi
		22.532	8.846	7.331	7.68
		22.921	13.744	10.701	9.916
		23.101	11.457	9.532	9.339
		31.768	9.8	9.375	12.795
	Mean	25.0805	10.9617	9.23475	9.9325
	STDEV	4.46465	2.14571	1.40026	2.13074
