# Supplementary material for: Cells must express components of the planar cell polarity system and extracellular matrix to support cytonemes
Source: eLife. 2016 Sep 3;5:e18979. doi: 10.7554/eLife.18979 (PMC5030081; doi:10.7554/eLife.18979)
Supplement: Figure 9—source data 1. — (A) The number of ASP cytonemes of ap>wbRNAi flies. (B–D) The numbers of ASP cytonemes in mew/+, wb/+ and mew/+; wb/+ flies. (E,I) Quantification of Dad-GFP fluorescence and dpERK staining in ap>wbRNAi flies. (F–H) Quantification of Dad-GFP fluorescence in mew/+, wb/+ and mew/+; wb/+ flies. (J–L) Quantification of dpERK staining in mew/+, wb/+ and mew/+; wb/+ flies. DOI: http://dx.doi.org/10.7554/eLife.18979.027 [file elife-18979-fig9-data1.xlsx]

## Sheet: Sheet1
Figure 9 A	wb	40	103	0.39
		33	110	0.3
		28	102	0.27
		42	106	0.4
		41	131	0.31
	Mean			0.33
	STDEV			0.05
Figure 9 B-D	wb	89	148	0.6
		93	164	0.57
		89	168	0.53
		61	125	0.49
		98	138	0.71
	Mean			0.58
	STDEV			0.08
	mew	55	112	0.49
		57	117	0.49
		99	145	0.68
		106	164	0.65
		90	163	0.55
	Mean			0.57
	STDEV			0.09
	wb-mew	25	120	0.21
		19	88	0.22
		38	104	0.37
		47	112	0.42
		29	94	0.31
	Mean			0.3
	STDEV			0.09
Figure 9E,I	dad-GFP	wbRNAi	dpERK	wbRNAi
		9.378		24.946
		11.997		18.101
		7.061		16.451
		6.444		19.437
	Mean	8.72		19.7338
	STDEV	2.5235		3.6832
Figure 9J-L	dpERK	mew/+	wb/+	mew/+; wb/+
		41.359	38.83	28.029
		48.05	40.639	15.497
		48.255	39.2	23.445
		41.405	53.357	24.522
	Mean	44.7672	43.0065	22.8732
	STDEV	3.90989	6.94431	5.29264
Figure 9F-H	dad-GFP	mew/+	wb/+	mew/+; wb/+
		30.46	27.847	16.862
		24.22	29.394	14.489
		27.858	20.933	7.335
		24.085	25.468	9.686
	Mean	26.6558	25.9105	12.093
	STDEV	3.08001	3.69035	4.3557
