# Supplementary figures and images for: Cells must express components of the planar cell polarity system and extracellular matrix to support cytonemes
Source: eLife journal article supplement (doi:10.7554/elife.18979), 2016-09-03

Figure 5, supplement 2

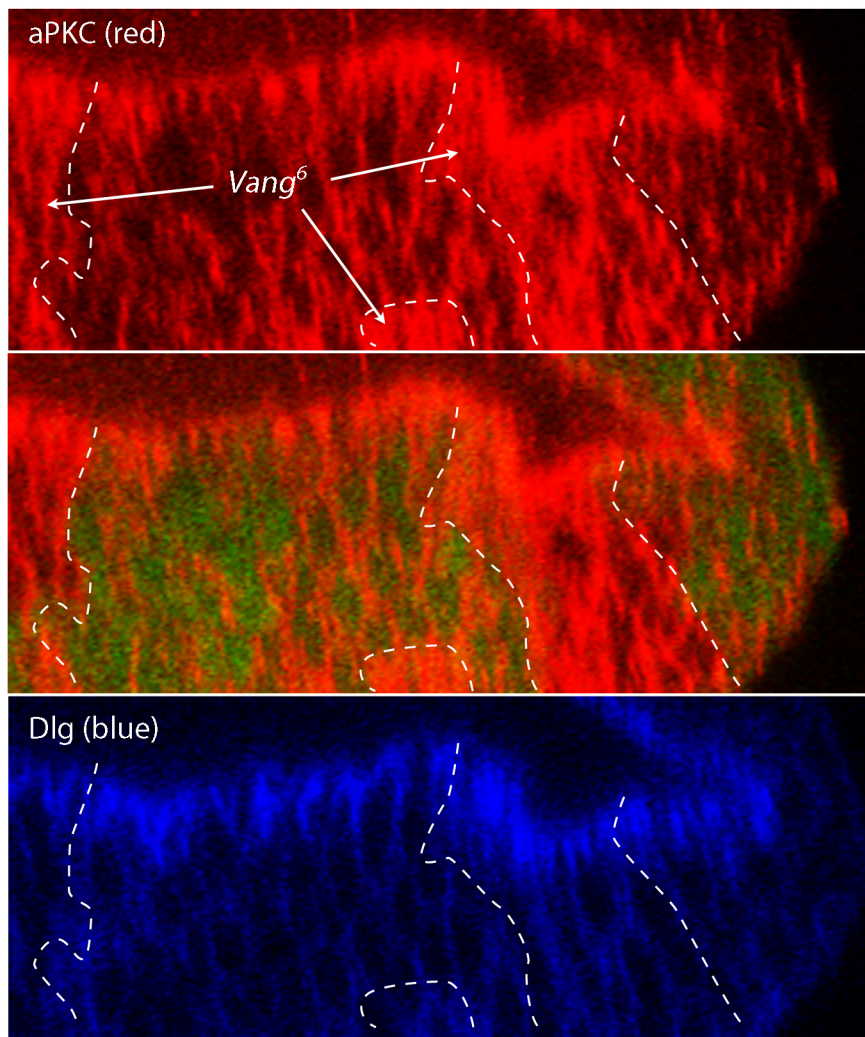

Supplement: supp [file elife-18979-supp-v1.zip]

Figure 2, supplement 1

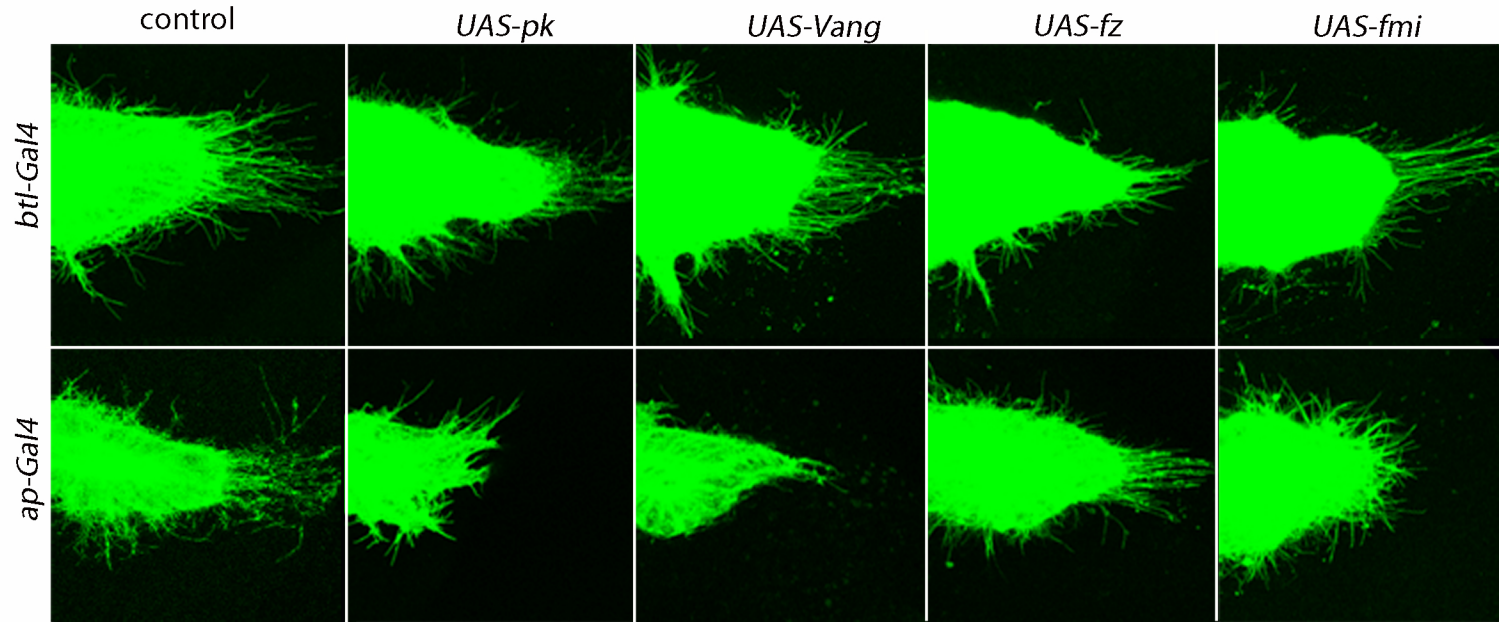

Supplement: supp [file elife-18979-supp-v1.zip]

Figure 5, supplement 1

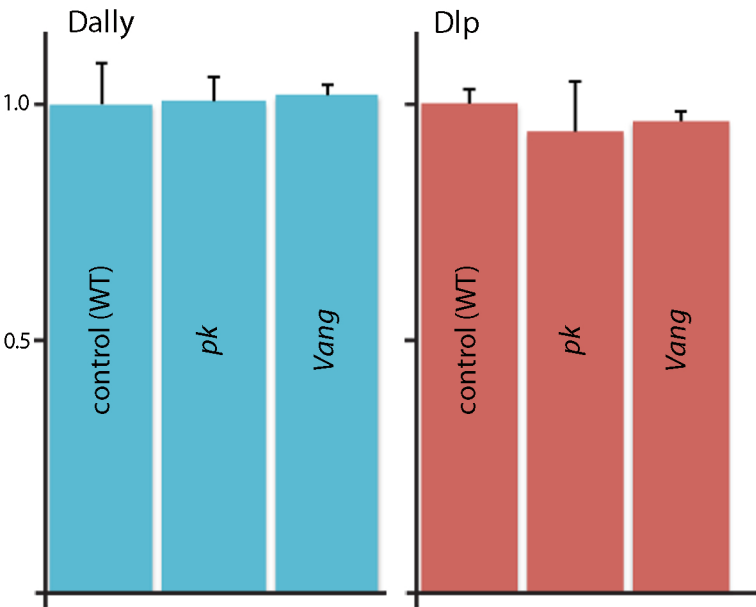

Supplement: supp [file elife-18979-supp-v1.zip]

Figure 8-supplement 1

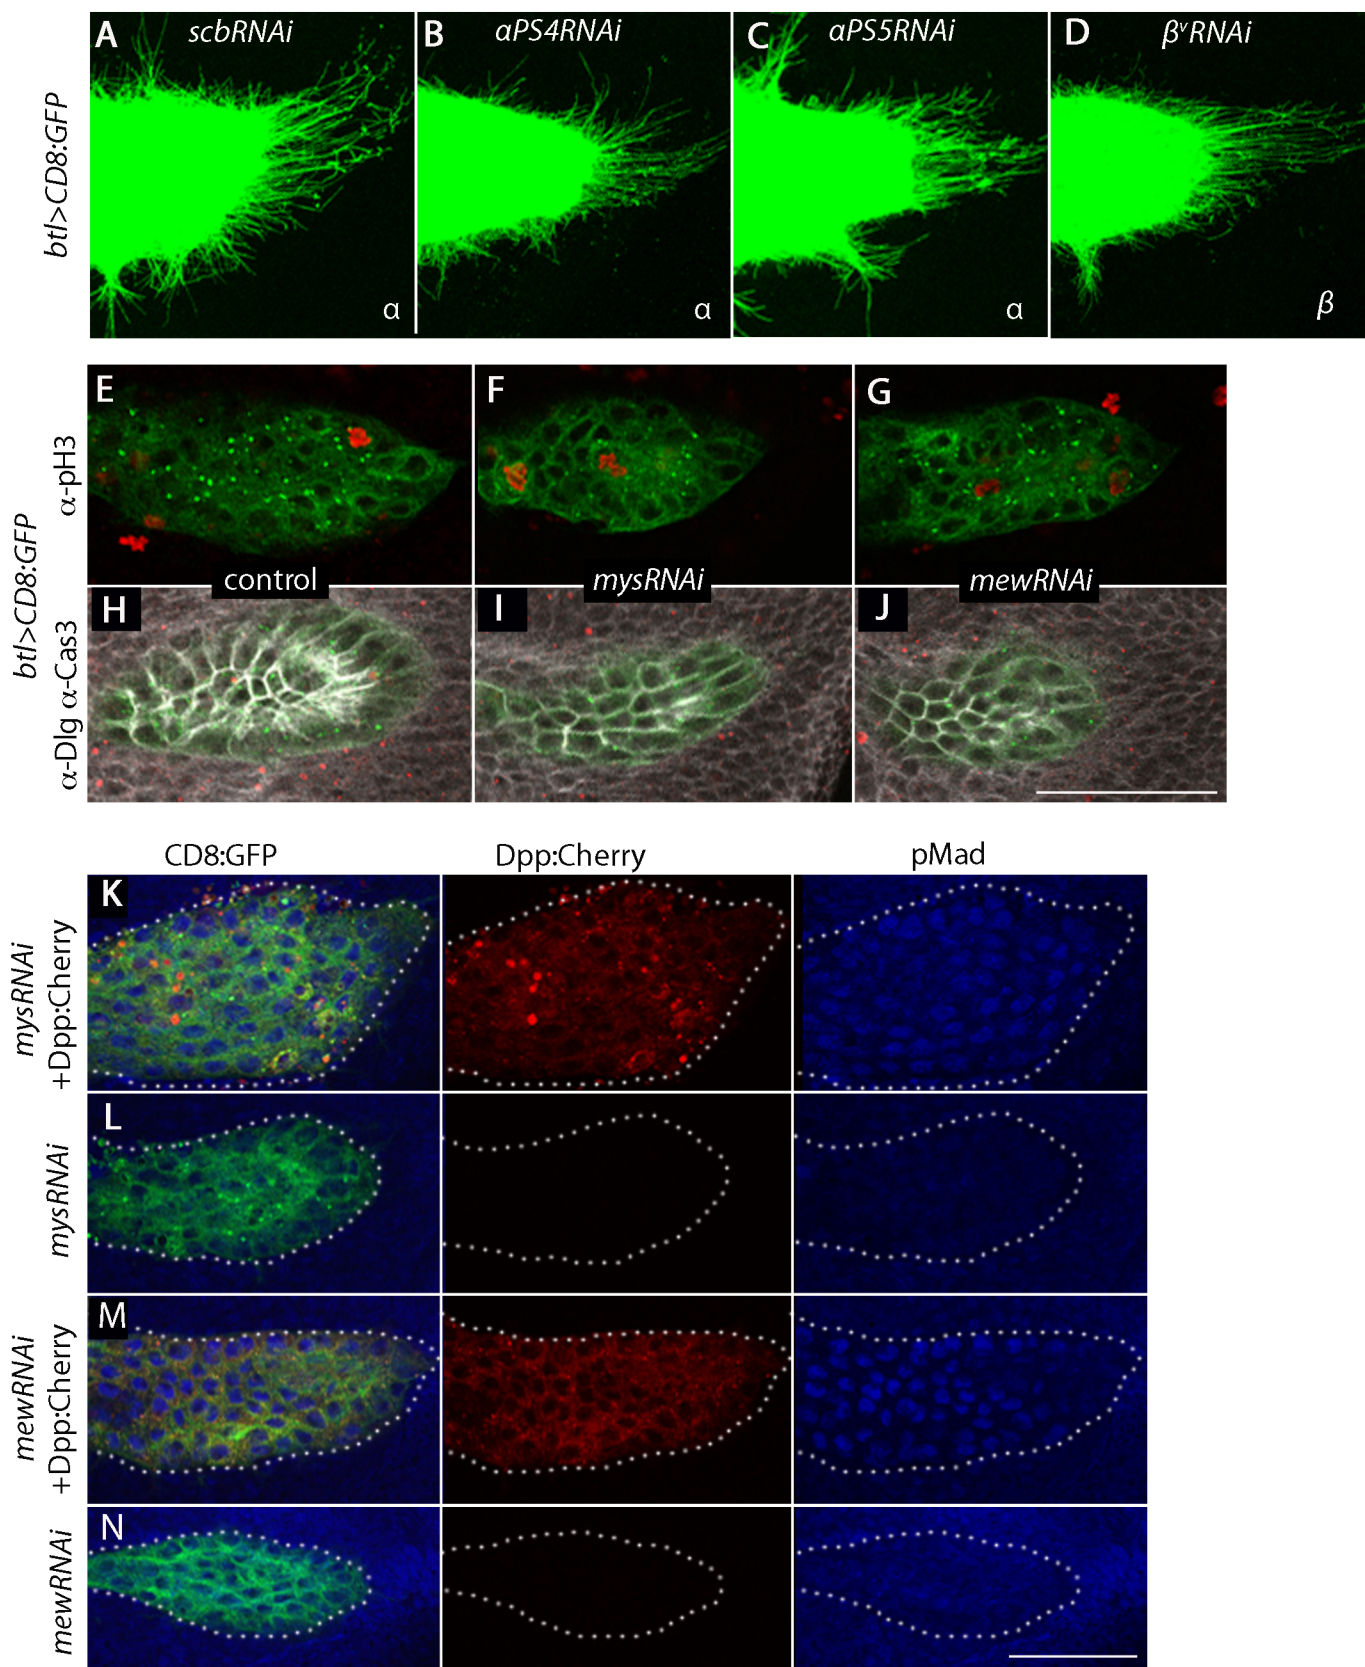

Supplement: supp [file elife-18979-supp-v1.zip]

Figure 1, supplement 1

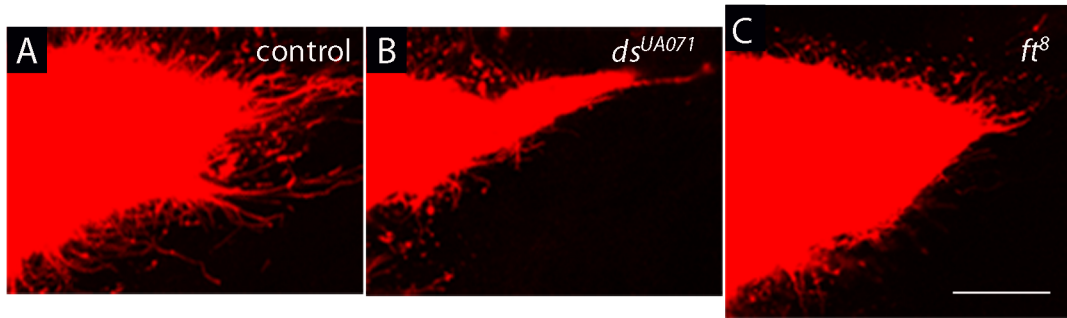

Supplement: supp [file elife-18979-supp-v1.zip]
